# Supplementary material
Source: PubMed Central journal article supplement (PMC2783329)
Supplement: NIHMS150909-supplement-1_si_001.pdf [file NIHMS150909-supplement-1_si_001.pdf]

# An Autoinhibited Coiled-Coil Design Strategy for Split-Protein Protease Sensors

*Sujan S. Shekhawat, Jason R. Porter, Akshay Sriprasad, Indraneel Ghosh\**

Department of Chemistry & Biochemistry, University of Arizona, Tucson AZ 85721

## **Supporting Information**

**Figure S1:** Tabulation of all constructs used in these studies.

**Figure S2:** Sequences of all constructs utilized in these studies.

**Figure S3:** Control experiments with singly inhibited coiled-coil protease sensor.

**Figure S4:** TEV protease cleavage studies utilizing  $^{35}\text{S}$  methionine labeling.

**Figure S5:** TEV protease cleavage studies utilizing  $^{35}\text{S}$  methionine labeling.

**Figure S6:** Model for alternative assemblies of singly inhibited coiled-coil sensors.

**Figure S7:** Model for alternative assemblies for doubly inhibited coiled-coil sensors.

| Reassembly Pair                                         | Split Protein Fusion                                      | Protease Cleavable Linker |
|---------------------------------------------------------|-----------------------------------------------------------|---------------------------|
| B-NFluc<br>CFluc-A                                      | Firefly Luciferase(2-416)<br>Firefly Luciferase( 398-550) | TEV                       |
| B-NFluc<br>CFlucA-TEV-B'                                | Firefly Luciferase(2-416)<br>Firefly Luciferase( 398-550) | TEV                       |
| B-NFluc<br>CFlucA-TEV-B' <sub>2A</sub>                  | Firefly Luciferase(2-416)<br>Firefly Luciferase (398-550) | TEV                       |
| B-NFluc<br>CFluc-A-TEVB' <sub>4A</sub>                  | Firefly Luciferase(2-416)<br>Firefly Luciferase( 398-550) | TEV                       |
| A'-TEV-B-NFluc<br>CFlucA-TEV-B'                         | Firefly Luciferase(2-416)<br>Firefly Luciferase( 398-550) | TEV                       |
| A'-TEV-B-NFluc<br>CFluc-A-TEV-B' <sub>2A</sub>          | Firefly Luciferase(2-416)<br>Firefly Luciferase( 398-550) | TEV                       |
| A'-TEV-B-NFluc<br>CFluc-A-TEVB' <sub>4A</sub>           | Firefly Luciferase(2-416)<br>Firefly Luciferase( 398-550) | TEV                       |
| A'-CASP3-B-NFluc<br>CFluc-A-CASP3-B'                    | Firefly Luciferase(2-416)<br>Firefly Luciferase( 398-550) | CASPASE-3                 |
| RR-NFluc<br>CFluc-EE                                    | Firefly Luciferase(2-416)<br>Firefly Luciferase( 398-550) | TEV                       |
| RR-NFluc<br>CFluc-EE-TEVRR'                             | Firefly Luciferase(2-416)<br>Firefly Luciferase( 398-550) | TEV                       |
| RR-NFluc<br>CFluc-EE-TEV-RR' <sub>3A</sub>              | Firefly Luciferase(2-416)<br>Firefly Luciferase (398-550) | TEV                       |
| RR-NFluc<br>CFluc-EE-TEV-RR' <sub>6A</sub>              | Firefly Luciferase(2-416)<br>Firefly Luciferase( 398-550) | TEV                       |
| N $\beta$ Lac-A-TEV-B'<br>B-C $\beta$ Lac               | $\beta$ Lactamase (26-196)<br>$\beta$ Lactamase (198-290) | TEV                       |
| N $\beta$ Lac-A-TEV-B' <sub>4A</sub><br>B-C $\beta$ Lac | $\beta$ Lactamase (26-196)<br>$\beta$ Lactamase (198-290) | TEV                       |

**Figure S1.** Protein fusions and reporter fragments with protease cleavable linkers used in these studies.

| Protein Construct      | Sequence                                                                                                         |
|------------------------|------------------------------------------------------------------------------------------------------------------|
| CFluc-Acid             | CFluc-AQLEKELQALEKKLAQLEWENQALE KELAQ                                                                            |
| Base-NFluc             | AQLKKKLQANKKELAQLKWKLQALKKKLAQ-NFluc                                                                             |
| CFluc-Acid-TEV-Base    | CFluc-AQLEKELQALEKKLAQLEWENQALE KELAQQGGGGENLYFQGGKLGGGG AQLKKKLQANKKELAQLKWKLQALKKKLAQ                          |
| CFluc-Acid-TEV-Base2A  | CFluc-AQLEKELQALEKKLAQLEWENQALE KELAQQGGGGENLYFQGGKLGGGGAQAKKKAQANKKELAQLKWKLQALKKKLAQ                           |
| CFluc-Acid-TEV-Base4A  | CFluc-AQLEKELQALEKKLAQLEWENQALE KELAQQGGGGENLYFQGGKLGGGGAQAKKKAQANKKELAQLKWKLQALKKKLAQ                           |
| Acid-TEV-Base-NFluc    | AQLEKELQALEKKLAQLEWENQALE KELAQQGGGGENLYFQGGKLGGGG AQLKKKLQANKKELAQLKWKLQALKKKLAQ-NFluc                          |
| CFluc-Acid-CASP3-Base  | CFluc-AQLEKELQALEKKLAQLEWENQALE KELAQQGGGDEVDGKLGGGG AQLKKKLQANKKELAQLKWKLQALKKKLAQ                              |
| Acid-CASP3-Base-NFluc  | AQLEKELQALEKKLAQLEWENQALE KELAQQGGGDEVDGKLGGGG AQLKKKLQANKKELAQLKWKLQALKKKLAQ-NFluc                              |
| CFluc-EE               | CFluc- LEIEAAFLEQENTALETEVAELEQEVQRLENIVSQYETRYGPL                                                               |
| RR-NFluc               | LEIRAAFLRRRNTALRTRVAELRQRVQRLRNIVSQYETRYGPL-NFluc                                                                |
| CFluc-EE-TEV-RR        | CFluc- LEIEAAFLEQENTALETEVAELEQEVQRLENIVSQYETRYGPLGGGGENLYFQGGKLGGGGLEIRAAFLRRRNTALRTRVAELRQRVQRLRNIVSQYETRYGPL  |
| CFluc-EE-TEV-RR3A      | CFluc- LEIEAAFLEQENTALETEVAELEQEVQRLENIVSQYETRYGPLGGGGENLYFQGGKLGGGGLEIRAAFAARRRATAARTRVAELRQRVQRLRNIVSQYETRYGPL |
| CFluc-EE-TEV-RR6A      | CFluc- LEIEAAFLEQENTALETEVAELEQEVQRLENIVSQYETRYGPLGGGGENLYFQGGKLGGGGLEIRAAFAARRRATAARTRVAELRQRVQRLRNIVSQYETRYGPL |
| NβLac-Acid-TEV-Base    | NβLac-AQLEKELQALEKKLAQLEWENQALE KELAQQGGGGENLYFQGGKLGGGG AQLKKKLQANKKELAQLKWKLQALKKKLAQ                          |
| NβLac-Acid-TEV-Base 4A | NβLac-AQLEKELQALEKKLAQLEWENQALE KELAQQGGGGENLYFQGGKLGGGGAQAKKKAQANKKELAQLKWKLQALKKKLAQ                           |
| Base-CβLac             | AQLKKKLQANKKELAQLKWKLQALKKKLAQ-CβLac                                                                             |

**Figure S2.** Amino acid sequences for various protein constructs used in the study, only coiled coil sequences are shown.

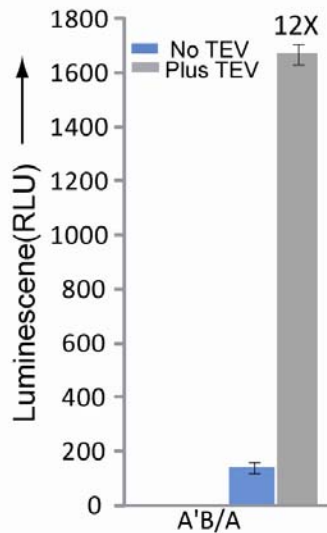

**Figure S3.** Singly inhibited A'B/A firefly luciferase system utilizing 1 pmol each of B-NFluc and CFluc-A mRNA with (grey) and without (blue) TEV protease.



Desired Autoinhibited  
Intramolecular Complexes

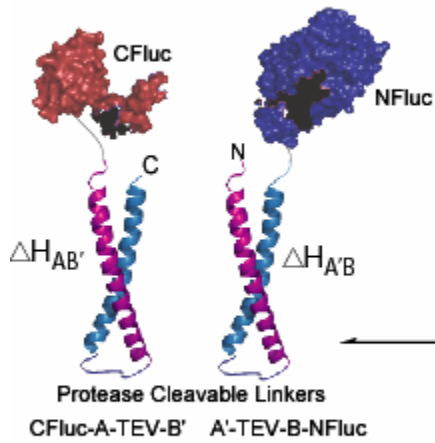

Intramolecular complexes are  
entropically favorable

Undesired Intermolecular Complex

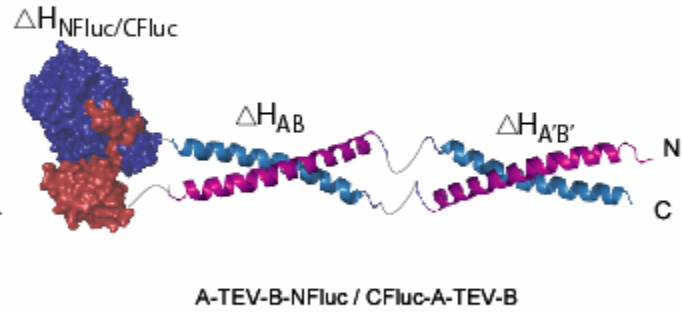

Enthalpic Stabilization is similar assuming  
 $H_{NFluc/CF luc}$  is small

**Figure S7.** A model of the proposed intramolecularly inhibited coiled-coil system (left) and the extended coiled-coil assembly (right) described in the manuscript for the doubly inhibited firefly luciferase turn-on sensor. The complex to the right would be significantly disfavored entropically based on molecularity but possibly favored enthalpically over the intramolecular auto-inhibited coiled-coils (left). Based on the results (almost no signal from reassembled luciferase) it is likely that the entropic cost of the undesired complex (right) far outweighs any enthalpic benefit under our experimental conditions.
